# Supplementary material
Source: PubMed Central journal article supplement (PMC2483368)
Supplement: tpc.108.059741_1.pdf [file tpc.108.059741_1.pdf]

**Supplementary Figure 2.** Expression Analysis of *RHF1a* and *RHF2a* in Wild-Type Inflorescence via Quantitative RT-PCR.

In wild-type inflorescence, the relative transcription level of *RHF2a* is 8-fold higher than that of *RHF1a*.

**Supplementary Figure 2**

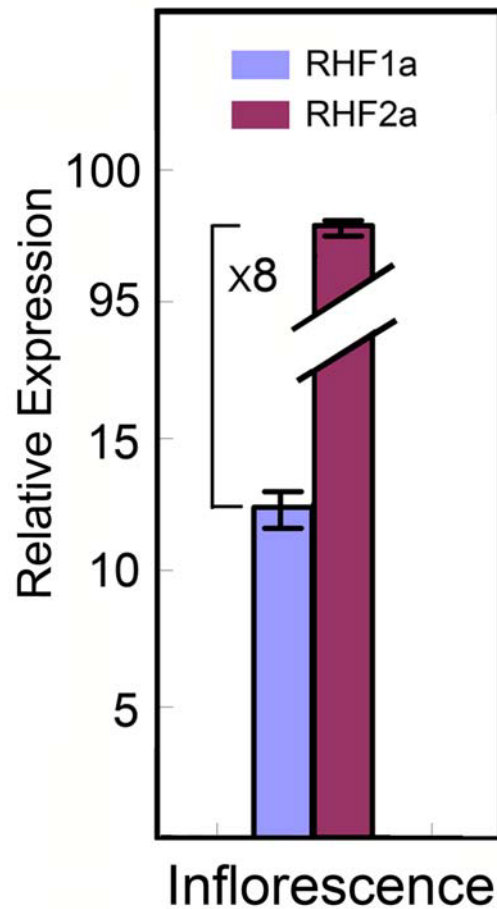

---

**Supplementary Table 1. PCR Primers Used in this Study**

---

|                |                                                     |
|----------------|-----------------------------------------------------|
| AbS1           | 5'-CAT CTA GAA TGT CTA ATT TCA CTT ATA CAT CTG C-3' |
| AbAS1          | 5'-TGG GTA CCT CAG CAC GTT TCT CCT C-3'             |
| RHF1a-042445-R | 5'-TGA CCA AAT CAG TAG GAT GAA T-3'                 |
| LBb1           | 5'-GCG TGG ACC GCT TGC TGC AAC T-3'                 |
| RHF2a-023787-F | 5'-CAA TGC TTT AGG GGA GGG TTC-3'                   |
| RHF2a-023787-R | 5'-AGA ATT TGT GGG CGA AAA ACG-3'                   |
| KRP6-NT-MYC-F2 | 5'-CTC GGA TCC GCA TGA GCG AGA GAA AGC GAG-3'       |
| KRP6-NT-MYC-R2 | 5'-CTC ACT AGT TTA AAG TCG ATC CCA CTT GTA-3'       |
| KRP6-LAT52-F   | 5'-AAC GTC GAC ATG AGC GAG AGA AAG CGA GA-3'        |
| KRP6-LAT52-R   | 5'-CTC ACT AGT TTA AAG TCG ATC CCA CTT GT-3'        |
| KRP6-RT-F1     | 5'-CTT CTG ATT CAT CAC CGG ACT C-3'                 |
| KRP6-RT-R1     | 5'-ACA CCA AAC GAC GAA CTG TTC T-3'                 |
| RHF1a-salk-FN1 | 5'-CTG CTT TCA ACT TAT CCG ACA A-3'                 |
| RHF1a-salk-RN1 | 5'-AAC AAA CAA TTG CCA GCA AAT A-3'                 |
| RHF1a-Salk-F2  | 5'-CTT GTC CAA GTC CTG GCT CAA T-3'                 |
| RHF1a-Salk-R2  | 5'-GCA GTA GCA GTG GAG GTT GAT A-3'                 |
| R1-F           | 5'-TTC ACT CTG AGG AGG AGG AAT C-3'                 |
| R1-R           | 5'-GCA GTA GCA GTG GAG GTT GAT A-3'                 |
| RHF2a-Salk-F1  | 5'-TTG AGG CTG TGG AAC AGG AGA G-3'                 |
| RHF2a-Salk-R1  | 5'-AAG AAG TTG GTG GCT GCG TGT T-3'                 |
| RHF2a-SALK-F2  | 5'-GTC TCG ATT AAA CGC TGT CTC C-3'                 |
| RHF2a-SALK-R2  | 5'-CCA GAA CCA GTC GCA CAT GTT T-3'                 |
| R2-F           | 5'-CAC TTG GCT GCT GCT GCT GCT A-3'                 |
| R2-R           | 5'-CCG CTG CTG CTC TAT TGT GCT C-3'                 |
| TUB8-5'        | 5'-CGT GGA TCA CAG CAA TAC AGA GCC-3'               |

|              |                                             |
|--------------|---------------------------------------------|
| TUB8-3'      | 5'-CCT CCT GCA CTT CCA CTT CGT CTT C-3'     |
| RHF2a-ISH-F  | 5'-TGC CAC CAT ATT TCG TCA TCC A-3'         |
| RHF2a-ISH-R  | 5'-AGA GCC AAG ATC TGC CAT GGA C-3'         |
| KRP6-ISH-F   | 5'-ATG AGC GAG AGA AAG CGA GAG C-3'         |
| KRP6-ISH-R   | 5'-CCG CCG TTG GAG TCT TCC TCA C-3'         |
| RHF1a-R-FLAG | 5'-CTA GAT CTG CAC GTT TCT CCT CCC TGC A-3' |
| Flag-1       | 5'-GAG GAT TAC AAG GAT GAC G-3'             |
| Flag-2       | 5'-CTA GAT ATC GTA ATC CCT AGG CTT ATC-3'   |

---
